# Supplementary material
Source: PubMed Central journal article supplement (PMC8755425)
Supplement: mmc1.pdf [file mmc1.pdf]

**The impact of the COVID-19 pandemic and policy response on health care utilization:  
Evidence from county-level medical claims and cellphone data**

**Supplementary Appendix**

**Appendix Table 1: Changes in Sample Population Following Policy Implementation**

|                            | (1)                  | (2)               | (3)                 | (4)                     | (5)                   | (6)                   |
|----------------------------|----------------------|-------------------|---------------------|-------------------------|-----------------------|-----------------------|
|                            | sample population    |                   |                     | ln(sample population)   |                       |                       |
| post shelter in place      | -3.721***<br>(1.303) | -1.208<br>(1.352) | 5.941***<br>(1.364) | -0.0222***<br>(0.00647) | 0.0540***<br>(0.0107) | 0.0600***<br>(0.0118) |
| Weeks since first case FE  |                      | X                 | X                   |                         | X                     | X                     |
| Weeks since first death FE |                      | X                 | X                   |                         | X                     | X                     |
| Year X Week FE             |                      |                   | X                   |                         |                       | X                     |
| Observations               | 3,567,013            | 3,567,013         | 3,567,013           | 3,567,013               | 3,567,013             | 3,567,013             |
| R-squared                  | 0.653                | 0.653             | 0.653               | 0.942                   | 0.943                 | 0.943                 |

This table presents changes in the sample population, measured in cells at the age category, gender, county, and week level, following the implementation of shelter in place policies. Regression models were estimated using ordinary least squares. Regression models also include controls for the patient's age and gender, and fixed effects for week and county. Standard errors are clustered at the county level. \*\*\* p<0.01, \*\* p<0.05, \* p<0.1

**Appendix Table 2:** Heterogeneous Effects of Social Distancing Policies on Preventive, Elective, and Non-Elective Procedure Utilization

|                                      | (1)         | (2)                          | (3)           | (4)       | (5)                                      | (6)              | (7)                                      | (8)          |
|--------------------------------------|-------------|------------------------------|---------------|-----------|------------------------------------------|------------------|------------------------------------------|--------------|
|                                      | Colonoscopy | Preventive Care<br>Mammogram | Immunizations | MRI       | Elective Care<br>Musculoskeletal surgery | Cataract surgery | Office visits<br>In-person office visits | Telemedicine |
| <b>Poverty quartiles</b>             |             |                              |               |           |                                          |                  |                                          |              |
| post shelter in place X 2nd quartile | 0.800*      | 3.172                        | 2.988*        | 0.537**   | 0.231**                                  | 0.0211           | 32.93**                                  | -24.49*      |
|                                      | (0.433)     | (1.981)                      | (1.616)       | (0.237)   | (0.106)                                  | (0.0228)         | (13.45)                                  | (14.35)      |
| post shelter in place X 3rd quartile | 0.0725      | -1.059                       | -0.856        | -0.0640   | 0.0978                                   | -0.0250          | 2.138                                    | -8.183       |
|                                      | (0.579)     | (2.213)                      | (1.777)       | (0.364)   | (0.108)                                  | (0.0408)         | (18.09)                                  | (12.84)      |
| post shelter in place X 4th quartile | -0.0132     | -1.247                       | 0.0589        | -0.00723  | 0.0409                                   | -0.0128          | 3.368                                    | -4.644       |
|                                      | (0.427)     | (1.918)                      | (0.909)       | (0.199)   | (0.0795)                                 | (0.0187)         | (10.92)                                  | (9.286)      |
| <b>White race quartiles</b>          |             |                              |               |           |                                          |                  |                                          |              |
| post shelter in place X 2nd quartile | -0.218      | -0.469                       | -0.789        | -0.196    | -0.0725                                  | 0.00330          | -0.571                                   | -3.333       |
|                                      | (0.421)     | (1.634)                      | (1.407)       | (0.244)   | (0.0781)                                 | (0.0147)         | (10.91)                                  | (9.265)      |
| post shelter in place X 3rd quartile | 0.0344      | 0.192                        | -1.460        | -0.151    | -0.0642                                  | 0.00657          | 1.761                                    | -10.58       |
|                                      | (0.230)     | (1.229)                      | (1.167)       | (0.148)   | (0.0510)                                 | (0.0105)         | (6.964)                                  | (6.890)      |
| post shelter in place X 4th quartile | -0.375      | -1.405                       | -2.781**      | -0.353*   | -0.131*                                  | -0.0119          | -11.68                                   | 2.350        |
|                                      | (0.328)     | (1.467)                      | (1.325)       | (0.190)   | (0.0756)                                 | (0.0160)         | (9.528)                                  | (8.540)      |
| <b>Age categories</b>                |             |                              |               |           |                                          |                  |                                          |              |
| post shelter in place X ages 3-12    |             |                              |               | -0.152*** | -0.0338*                                 | -0.00614*        | -20.83***                                | 21.81***     |
|                                      |             |                              |               | (0.0584)  | (0.0174)                                 | (0.00330)        | (4.814)                                  | (6.134)      |
| post shelter in place X ages 13-18   |             |                              |               | -0.348*** | -0.0840***                               | -0.0119*         | -6.579*                                  | 25.34***     |
|                                      |             |                              |               | (0.107)   | (0.0326)                                 | (0.00678)        | (3.866)                                  | (7.370)      |
| post shelter in place X ages 19-26   |             |                              |               | -0.250**  | -0.0570                                  | -0.00910         | -4.398                                   | 32.97***     |
|                                      |             |                              |               | (0.108)   | (0.0371)                                 | (0.00563)        | (4.298)                                  | (8.857)      |
| post shelter in place X ages 27-45   |             |                              |               | -0.749*** | -0.201***                                | -0.00600         | -54.29***                                | 100.7***     |
|                                      |             |                              |               | (0.260)   | (0.0773)                                 | (0.00379)        | (16.28)                                  | (24.16)      |
| post shelter in place X ages 46-59   |             |                              |               | -1.106*** | -0.449***                                | -0.114***        | -53.18***                                | 65.32***     |
|                                      |             |                              |               | (0.429)   | (0.165)                                  | (0.0388)         | (15.91)                                  | (13.14)      |
| post shelter in place X ages 60-64   |             |                              |               | -0.921**  | -0.350***                                | -0.341**         | -28.15**                                 | 27.41***     |
|                                      |             |                              |               | (0.412)   | (0.119)                                  | (0.141)          | (13.44)                                  | (7.339)      |

Regression models were estimated using ordinary least squares. Regression models also include measures for the patient's age, gender, and county. Outcome measure is the number of patients, and all models are weighted for the total number of eligible enrollees. Standard errors are clustered at the county level. Immunizations are restricted to those aged 2 or younger. Colonoscopy is restricted to those 46 or older. Mammograms were restricted to females aged 46 or older. For these services, we do not examine heterogeneity based on age. \*\*\* p<0.01, \*\* p<0.05, \* p<0.1

**Appendix Table 3:** Heterogeneous Effects of Social Distancing Policies on Log-Transformed Preventive, Elective, and Non-Elective Procedure Utilization

|                                      | (1)         | (2)                          | (3)           | (4)        | (5)                                      | (6)              | (10)                                     | (11)         |
|--------------------------------------|-------------|------------------------------|---------------|------------|------------------------------------------|------------------|------------------------------------------|--------------|
|                                      | Colonoscopy | Preventive Care<br>Mammogram | Immunizations | MRI        | Elective Care<br>Musculoskeletal surgery | Cataract surgery | Office visits<br>In-person office visits | Telemedicine |
| <b>Poverty quartiles</b>             |             |                              |               |            |                                          |                  |                                          |              |
| post shelter in place X 2nd quartile | 0.0831**    | 0.0803**                     | 0.0454        | 0.0454*    | 0.0460**                                 | 0.00770          | 0.0902**                                 | -0.145       |
|                                      | (-0.0366)   | (0.0358)                     | (0.0452)      | (0.0240)   | (0.0196)                                 | (0.00870)        | (0.0422)                                 | (0.127)      |
| post shelter in place X 3rd quartile | 0.0675*     | 0.0928***                    | 0.0194        | 0.0237     | 0.0158                                   | -0.00511         | 0.113***                                 | -0.186*      |
|                                      | (-0.0362)   | (0.0297)                     | (0.0290)      | (0.0185)   | (0.0152)                                 | (0.0113)         | (0.0276)                                 | (0.104)      |
| post shelter in place X 4th quartile | 0.0613      | 0.0661                       | 0.0229        | 0.0127     | 0.0155                                   | -0.00511         | 0.0942***                                | -0.329*      |
|                                      | (-0.0535)   | (0.0522)                     | (0.0258)      | (0.0217)   | (0.0176)                                 | (0.00834)        | (0.0339)                                 | (0.195)      |
| <b>White race quartiles</b>          |             |                              |               |            |                                          |                  |                                          |              |
| post shelter in place X 2nd quartile | 0.0115      | 0.00347                      | 0.000818      | -0.000709  | -0.00788                                 | 0.00295          | -0.00921                                 | 0.0166       |
|                                      | (0.0430)    | (0.0333)                     | (0.0332)      | (0.0222)   | (0.0155)                                 | (0.00686)        | (0.0295)                                 | (0.123)      |
| post shelter in place X 3rd quartile | 0.0847***   | 0.0616                       | -0.0218       | 0.00691    | -0.00426                                 | 0.00691          | -0.0264                                  | -0.508***    |
|                                      | (0.0302)    | (0.0414)                     | (0.0546)      | (0.0234)   | (0.0144)                                 | (0.00467)        | (0.0426)                                 | (0.126)      |
| post shelter in place X 4th quartile | 0.0792**    | 0.126***                     | 0.0357        | 0.0193     | -0.00806                                 | 0.00134          | 0.0376                                   | -0.758***    |
|                                      | (0.0321)    | (0.0358)                     | (0.0352)      | (0.0184)   | (0.0141)                                 | (0.00631)        | (0.0352)                                 | (0.118)      |
| <b>Age categories</b>                |             |                              |               |            |                                          |                  |                                          |              |
| post shelter in place X ages 3-12    |             |                              |               | -0.0425*** | -0.0108**                                | -0.00187**       | -0.200***                                | 0.828***     |
|                                      |             |                              |               | (0.0122)   | (0.00484)                                | (0.000955)       | (0.0104)                                 | (0.0298)     |
| post shelter in place X ages 13-18   |             |                              |               | -0.0999*** | -0.0311***                               | -0.00393*        | -0.0267*                                 | 0.886***     |
|                                      |             |                              |               | (0.0177)   | (0.00815)                                | (0.00215)        | (0.0141)                                 | (0.0441)     |
| post shelter in place X ages 19-26   |             |                              |               | -0.0579*** | -0.0185                                  | -0.00323         | 0.104***                                 | 0.976***     |
|                                      |             |                              |               | (0.0162)   | (0.0115)                                 | (0.00204)        | (0.0132)                                 | (0.0414)     |
| post shelter in place X ages 27-45   |             |                              |               | -0.0908*** | -0.0670***                               | -0.00327         | 0.0524***                                | 1.358***     |
|                                      |             |                              |               | (0.0212)   | (0.0173)                                 | (0.00205)        | (0.0141)                                 | (0.0558)     |
| post shelter in place X ages 46-59   |             |                              |               | -0.0918*** | -0.0935***                               | -0.0529***       | 0.0631***                                | 1.514***     |
|                                      |             |                              |               | (0.0211)   | (0.0210)                                 | (0.0154)         | (0.0136)                                 | (0.0419)     |
| post shelter in place X ages 60-64   |             |                              |               | -0.106***  | -0.0973***                               | -0.116***        | 0.0412**                                 | 0.948***     |
|                                      |             |                              |               | (0.0254)   | (0.0205)                                 | (0.0305)         | (0.0190)                                 | (0.0476)     |

Regression models were estimated using ordinary least squares. Regression models also include measures for the patient's age, gender, and county. Outcome measure is the log-transformed number of patients, and all models are weighted for the total number of eligible enrollees. Standard errors are clustered at the county level. Immunizations are restricted to those aged 2 or younger. Colonoscopy is restricted to those 46 or older. Mammograms were restricted to females aged 46 or older. For these services, we do not examine heterogeneity based on age. \*\*\* p<0.01, \*\* p<0.05, \* p<0.1

**Appendix Table 4:** Effect of Social Distancing Policies on Preventive, Elective, and Non-Elective Procedure Utilization, Alternative Policy Construction

|                                   | (1)                  | (2)                       | (3)                | (4)                   | (5)                            | (6)                  | (7)                    | (8)                     | (9)                 |
|-----------------------------------|----------------------|---------------------------|--------------------|-----------------------|--------------------------------|----------------------|------------------------|-------------------------|---------------------|
| <b>Panel A: Preventive Care</b>   |                      | <b>Colonoscopy</b>        |                    |                       | <b>Mammogram</b>               |                      |                        | <b>Immunizations</b>    |                     |
| post shelter in place             | -1.990***<br>(0.522) | -1.787***<br>(0.547)      | -0.408*<br>(0.220) | -8.262***<br>(2.008)  | -6.723***<br>(2.213)           | -0.868<br>(1.477)    | -2.606**<br>(1.101)    | -2.855**<br>(1.299)     | 0.00733<br>(1.161)  |
| Weeks since first case FE         |                      | X                         | X                  |                       | X                              | X                    |                        | X                       | X                   |
| Weeks since first death FE        |                      | X                         | X                  |                       | X                              | X                    |                        | X                       | X                   |
| Year X Week FE                    |                      |                           | X                  |                       |                                | X                    |                        |                         | X                   |
| Observations                      | 1,064,669            | 1,064,669                 | 1,064,669          | 529,100               | 529,100                        | 529,100              | 418,099                | 418,099                 | 418,099             |
| R-squared                         | 0.706                | 0.719                     | 0.749              | 0.783                 | 0.794                          | 0.816                | 0.879                  | 0.895                   | 0.904               |
| baseline mean                     | 4.1                  | 4.1                       | 4.1                | 21.6                  | 21.6                           | 21.6                 | 22.0                   | 22.0                    | 22.0                |
| <b>Panel B: Elective Care</b>     |                      | <b>MRI</b>                |                    |                       | <b>Musculoskeletal surgery</b> |                      |                        | <b>Cataract surgery</b> |                     |
| post shelter in place             | -1.141***<br>(0.293) | -0.989***<br>(0.280)      | -0.278*<br>(0.165) | -0.357***<br>(0.0909) | -0.307***<br>(0.0907)          | -0.114**<br>(0.0580) | -0.0878***<br>(0.0259) | -0.0820***<br>(0.0260)  | -0.0204<br>(0.0141) |
| Weeks since first case FE         |                      | X                         | X                  |                       | X                              | X                    |                        | X                       | X                   |
| Weeks since first death FE        |                      | X                         | X                  |                       | X                              | X                    |                        | X                       | X                   |
| Year X Week FE                    |                      |                           | X                  |                       |                                | X                    |                        |                         | X                   |
| Observations                      | 3,567,013            | 3,567,013                 | 3,567,013          | 3,567,013             | 3,567,013                      | 3,567,013            | 3,567,013              | 3,567,013               | 3,567,013           |
| R-squared                         | 0.617                | 0.620                     | 0.628              | 0.489                 | 0.492                          | 0.499                | 0.256                  | 0.258                   | 0.263               |
| baseline mean                     | 3.3                  | 3.3                       | 3.3                | 1.1                   | 1.1                            | 1.1                  | 0.2                    | 0.2                     | 0.2                 |
| <b>Panel C: Non-Elective Care</b> |                      | <b>Labor and delivery</b> |                    |                       | <b>Chemotherapy</b>            |                      |                        | <b>Angiograms</b>       |                     |
| post shelter in place             | 0.0954<br>(0.0970)   | 0.159<br>(0.103)          | 0.153<br>(0.131)   | -0.0592<br>(0.0874)   | -0.0286<br>(0.0778)            | -0.0127<br>(0.0742)  | -0.131***<br>(0.0374)  | -0.0952***<br>(0.0366)  | -0.0471<br>(0.0419) |
| Weeks since first case FE         |                      | X                         | X                  |                       | X                              | X                    |                        | X                       | X                   |
| Weeks since first death FE        |                      | X                         | X                  |                       | X                              | X                    |                        | X                       | X                   |
| Year X Week FE                    |                      |                           | X                  |                       |                                | X                    |                        |                         | X                   |
| Observations                      | 1,064,628            | 1,064,628                 | 1,064,628          | 3,567,013             | 3,567,013                      | 3,567,013            | 3,567,013              | 3,567,013               | 3,567,013           |
| R-squared                         | 0.555                | 0.556                     | 0.556              | 0.542                 | 0.543                          | 0.544                | 0.439                  | 0.441                   | 0.442               |
| baseline mean                     | 1.8                  | 1.8                       | 1.8                | 1.5                   | 1.5                            | 1.5                  | 0.5                    | 0.5                     | 0.5                 |

Baseline means are calculated based on the ninth week of 2019. The shelter in place dummy is turned on when the policy is enacted. The shelter in place dummy is turned off when the policy is ended. Regression models were estimated using ordinary least squares. Regression models also include controls for the patient's age and gender, and fixed effects for week and county. The outcome measure is the number of patients, and all models are weighted for the total number of eligible enrollees. Standard errors are clustered at the county level. Immunizations are restricted to those aged 2 or younger. Colonoscopy is restricted to those 46 to 64. Mammograms were restricted to females aged 46 to 64. Deliveries were restricted to women between the ages of 19 and 45. \*\*\* p<0.01, \*\* p<0.05, \* p<0.1

**Appendix Table 5:** Effect of Social Distancing Policies on Log-Transformed Preventive, Elective, and Non-Elective Procedure Utilization, Alternative Policy Construction

|                                   | (1)                   | (4)                       | (5)                    | (6)                    | (9)                            | (10)                   | (11)                    | (14)                    | (15)                  |
|-----------------------------------|-----------------------|---------------------------|------------------------|------------------------|--------------------------------|------------------------|-------------------------|-------------------------|-----------------------|
| <b>Panel A: Preventive Care</b>   |                       | <b>Colonoscopy</b>        |                        |                        | <b>Mammogram</b>               |                        |                         | <b>Immunizations</b>    |                       |
| post shelter in place             | -0.340***<br>(0.0320) | -0.257***<br>(0.0430)     | -0.0683***<br>(0.0205) | -0.459***<br>(0.0223)  | -0.306***<br>(0.0367)          | -0.0831***<br>(0.0257) | -0.0871***<br>(0.0199)  | -0.0512**<br>(0.0237)   | -0.0109<br>(0.0288)   |
| Weeks since first case FE         |                       | X                         | X                      |                        | X                              | X                      |                         | X                       | X                     |
| Weeks since first death FE        |                       | X                         | X                      |                        | X                              | X                      |                         | X                       | X                     |
| Year X Week FE                    |                       |                           | X                      |                        |                                | X                      |                         |                         | X                     |
| Observations                      | 1,064,669             | 1,064,669                 | 1,064,669              | 529,100                | 529,100                        | 529,100                | 418,099                 | 418,099                 | 418,099               |
| R-squared                         | 0.739                 | 0.756                     | 0.779                  | 0.870                  | 0.889                          | 0.902                  | 0.927                   | 0.928                   | 0.929                 |
| baseline mean                     | 4.1                   | 4.1                       | 4.1                    | 21.6                   | 21.6                           | 21.6                   | 22.0                    | 22.0                    | 22.0                  |
| <b>Panel B: Elective Care</b>     |                       | <b>MRI</b>                |                        |                        | <b>Musculoskeletal surgery</b> |                        |                         | <b>Cataract surgery</b> |                       |
| post shelter in place             | -0.158***<br>(0.0166) | -0.116***<br>(0.0198)     | -0.0411**<br>(0.0162)  | -0.0987***<br>(0.0134) | -0.0752***<br>(0.0154)         | -0.0289**<br>(0.0132)  | -0.0360***<br>(0.00769) | -0.0309***<br>(0.00778) | -0.00755<br>(0.00521) |
| Weeks since first case FE         |                       | X                         | X                      |                        | X                              | X                      |                         | X                       | X                     |
| Weeks since first death FE        |                       | X                         | X                      |                        | X                              | X                      |                         | X                       | X                     |
| Year X Week FE                    |                       |                           | X                      |                        |                                | X                      |                         |                         | X                     |
| Observations                      | 3,567,013             | 3,567,013                 | 3,567,013              | 3,567,013              | 3,567,013                      | 3,567,013              | 3,567,013               | 3,567,013               | 3,567,013             |
| R-squared                         | 0.716                 | 0.718                     | 0.721                  | 0.551                  | 0.554                          | 0.558                  | 0.295                   | 0.298                   | 0.303                 |
| baseline mean                     | 3.3                   | 3.3                       | 3.3                    | 1.1                    | 1.1                            | 1.1                    | 0.2                     | 0.2                     | 0.2                   |
| <b>Panel C: Non-Elective Care</b> |                       | <b>Labor and delivery</b> |                        |                        | <b>Chemotherapy</b>            |                        |                         | <b>Angiograms</b>       |                       |
| post shelter in place             | 0.00563<br>(0.00863)  | 0.00999<br>(0.0120)       | 0.0121<br>(0.00982)    | -0.0114<br>(0.0108)    | -0.00265<br>(0.0107)           | 0.000621<br>(0.0118)   | -0.0482***<br>(0.00873) | -0.0333***<br>(0.00933) | -0.0186*<br>(0.0108)  |
| Weeks since first case FE         |                       | X                         | X                      |                        | X                              | X                      |                         | X                       | X                     |
| Weeks since first death FE        |                       | X                         | X                      |                        | X                              | X                      |                         | X                       | X                     |
| Year X Week FE                    |                       |                           | X                      |                        |                                | X                      |                         |                         | X                     |
| Observations                      | 1,064,628             | 1,064,628                 | 1,064,628              | 3,567,013              | 3,567,013                      | 3,567,013              | 3,567,013               | 3,567,013               | 3,567,013             |
| R-squared                         | 0.646                 | 0.646                     | 0.646                  | 0.626                  | 0.626                          | 0.626                  | 0.477                   | 0.479                   | 0.480                 |
| baseline mean                     | 1.8                   | 1.8                       | 1.8                    | 1.5                    | 1.5                            | 1.5                    | 0.5                     | 0.5                     | 0.5                   |

Baseline means are calculated based on the ninth week of 2019. The shelter in place dummy is turned on when the policy is enacted. The shelter in place dummy is turned off when the policy is ended. Regression models were estimated using ordinary least squares. Regression models also include controls for the patient's age and gender, and fixed effects for week and county. The outcome measure is the log-transformed number of patients, and all models are weighted for the total number of eligible enrollees. Standard errors are clustered at the county level. Immunizations are restricted to those aged 2 or younger. Colonoscopy is restricted to those 46 to 64. Mammograms were restricted to females aged 46 to 64. Deliveries were restricted to women between the ages of 19 and 45. \*\*\* p<0.01, \*\* p<0.05, \* p<0.1

**Appendix Table 6:** Effect of County-Level Shelter in Place Policies on Visits to Medical and Diagnostic Laboratories, Nursing Care Facilities, Retirement Communities and Specialty Hospitals, Alternative Policy Construction

|                               | (1)                                                   | (2)                    | (3)                   | (4)                     | (5)                   | (6)                 |
|-------------------------------|-------------------------------------------------------|------------------------|-----------------------|-------------------------|-----------------------|---------------------|
|                               | Medical and Diagnostic Laboratories                   |                        |                       | Nursing Care Facilities |                       |                     |
| <b>Panel A: Level changes</b> |                                                       |                        |                       |                         |                       |                     |
| post shelter in place         | -5.812***<br>(0.775)                                  | -1.036<br>(1.039)      | 0.996<br>(1.079)      | -12.36***<br>(1.395)    | -2.655*<br>(1.580)    | 0.438<br>(1.279)    |
| Weeks since first case FE     |                                                       | X                      | X                     |                         | X                     | X                   |
| Weeks since first death FE    |                                                       | X                      | X                     |                         | X                     | X                   |
| Year X Week FE                |                                                       |                        | X                     |                         |                       | X                   |
| Observations                  | 1,157,337                                             | 1,157,337              | 1,157,337             | 748,765                 | 748,765               | 748,765             |
| R-squared                     | 0.07                                                  | 0.07                   | 0.07                  | 0.21                    | 0.21                  | 0.22                |
| baseline mean                 | 28.09                                                 | 28.09                  | 28.09                 | 61.54                   | 61.54                 | 61.54               |
| <b>Panel B: Log changes</b>   |                                                       |                        |                       |                         |                       |                     |
| post shelter in place         | -0.198***<br>(0.0167)                                 | -0.0703***<br>(0.0206) | -0.00615<br>(0.0171)  | -0.221***<br>(0.0227)   | -0.0457*<br>(0.0243)  | 0.0172<br>(0.0187)  |
| Weeks since first case FE     |                                                       | X                      | X                     |                         | X                     | X                   |
| Weeks since first death FE    |                                                       | X                      | X                     |                         | X                     | X                   |
| Year X Week FE                |                                                       |                        | X                     |                         |                       | X                   |
| Observations                  | 1,157,337                                             | 1,157,337              | 1,157,337             | 748,765                 | 748,765               | 748,765             |
| R-squared                     | 0.10                                                  | 0.10                   | 0.10                  | 0.23                    | 0.23                  | 0.24                |
| Baseline mean                 | 2.59                                                  | 2.59                   | 2.59                  | 3.68                    | 3.68                  | 3.68                |
|                               | Retirement Communities and Assisted Living Facilities |                        |                       | Specialty Hospitals     |                       |                     |
| <b>Panel A: Level changes</b> |                                                       |                        |                       |                         |                       |                     |
| post shelter in place         | -8.572***<br>(0.796)                                  | -2.360**<br>(0.972)    | -0.0761<br>(0.792)    | -11.09***<br>(1.933)    | -4.489**<br>(2.210)   | -1.816<br>(2.192)   |
| Weeks since first case FE     |                                                       | X                      | X                     |                         | X                     | X                   |
| Weeks since first death FE    |                                                       | X                      | X                     |                         | X                     | X                   |
| Year X Week FE                |                                                       |                        | X                     |                         |                       | X                   |
| Observations                  | 1,622,258                                             | 1,622,258              | 1,622,258             | 294,129                 | 294,129               | 294,129             |
| R-squared                     | 0.13                                                  | 0.13                   | 0.13                  | 0.16                    | 0.16                  | 0.16                |
| baseline mean                 | 39.80                                                 | 39.80                  | 39.80                 | 39.71                   | 39.71                 | 39.71               |
| <b>Panel B: Log changes</b>   |                                                       |                        |                       |                         |                       |                     |
| post shelter in place         | -0.233***<br>(0.0171)                                 | -0.0667***<br>(0.0173) | -0.000644<br>(0.0112) | -0.235***<br>(0.0244)   | -0.114***<br>(0.0320) | -0.0446<br>(0.0294) |
| Weeks since first case FE     |                                                       | X                      | X                     |                         | X                     | X                   |
| Weeks since first death FE    |                                                       | X                      | X                     |                         | X                     | X                   |
| Year X Week FE                |                                                       |                        | X                     |                         |                       | X                   |
| Observations                  | 1,622,258                                             | 1,622,258              | 1,622,258             | 294,129                 | 294,129               | 294,129             |
| R-squared                     | 0.17                                                  | 0.18                   | 0.18                  | 0.21                    | 0.21                  | 0.22                |
| Baseline mean                 | 3.19                                                  | 3.19                   | 3.19                  | 2.77                    | 2.77                  | 2.77                |

Caption: The shelter in place dummy is turned on when the policy is enacted. The shelter in place dummy is turned off when the policy is ended. Unit of analysis is the number of visits in a week to health care provider locations. Baseline means are calculated based on the ninth week of 2019. Regression models were estimated using ordinary least squares and regressions include fixed effects for county and week. The outcome measure is the number of visits. We use the four-digit NAICS code to identify medical and diagnostic laboratories (6215), nursing care facilities (6231), retirement communities and assisted living facilities (6233), and specialty hospitals (6223). Standard errors are clustered at the county level. \*\*\* p<0.01, \*\* p<0.05, \* p<0.1

**Appendix Table 7: Effect of County-Level Shelter in Place Policies on Visits to Physician Office, General and Medical Service Hospitals, Health and Personal Care Stores, and Office of Dentists, Alternative Policy Construction**

|                                        | (1)                    | (2)                    | (3)                     | (4)                                   | (5)                   | (6)                     |
|----------------------------------------|------------------------|------------------------|-------------------------|---------------------------------------|-----------------------|-------------------------|
|                                        | Offices of Physicians  |                        |                         | General and Medical Service Hospitals |                       |                         |
| <b>Panel A: Level changes</b>          |                        |                        |                         |                                       |                       |                         |
| post shelter in place                  | -5.557***<br>(0.289)   | -1.862***<br>(0.389)   | 0.133<br>(0.349)        | -87.44***<br>(17.92)                  | -56.23***<br>(20.75)  | -27.59<br>(23.88)       |
| Weeks since first case FE              |                        | X                      | X                       |                                       | X                     | X                       |
| Weeks since first death FE             |                        | X                      | X                       |                                       | X                     | X                       |
| Year X Week FE                         |                        |                        | X                       |                                       |                       | X                       |
| Observations                           | 13,430,991             | 13,430,991             | 13,430,991              | 1,045,379                             | 1,045,379             | 1,045,379               |
| R-squared                              | 0.03                   | 0.03                   | 0.03                    | 0.17                                  | 0.17                  | 0.17                    |
| baseline mean                          | 31.09                  | 31.09                  | 31.09                   | 363.11                                | 363.11                | 363.11                  |
| <b>Panel B: Log changes</b>            |                        |                        |                         |                                       |                       |                         |
| post shelter in place                  | -0.191***<br>(0.00600) | -0.102***<br>(0.00990) | -0.0419***<br>(0.00620) | -0.269***<br>(0.0528)                 | -0.231***<br>(0.0599) | -0.158**<br>(0.0681)    |
| Weeks since first case FE              |                        | X                      | X                       |                                       | X                     | X                       |
| Weeks since first death FE             |                        | X                      | X                       |                                       | X                     | X                       |
| Year X Week FE                         |                        |                        | X                       |                                       |                       | X                       |
| Observations                           | 13,430,991             | 13,430,991             | 13,430,991              | 1,045,379                             | 1,045,379             | 1,045,379               |
| R-squared                              | 0.06                   | 0.06                   | 0.06                    | 0.23                                  | 0.23                  | 0.23                    |
| Baseline mean                          | 2.60                   | 2.60                   | 2.60                    | 4.44                                  | 4.44                  | 4.44                    |
| <b>Health and Personal Care Stores</b> |                        |                        |                         |                                       |                       |                         |
| <b>Office of Dentists</b>              |                        |                        |                         |                                       |                       |                         |
| <b>Panel A: Level changes</b>          |                        |                        |                         |                                       |                       |                         |
| post shelter in place                  | -15.51***<br>(1.384)   | -7.882***<br>(1.622)   | -2.027<br>(1.559)       | -3.691***<br>(0.292)                  | -2.134***<br>(0.332)  | -0.963***<br>(0.361)    |
| Weeks since first case FE              |                        | X                      | X                       |                                       | X                     | X                       |
| Weeks since first death FE             |                        | X                      | X                       |                                       | X                     | X                       |
| Year X Week FE                         |                        |                        | X                       |                                       |                       | X                       |
| Observations                           | 3,809,626              | 3,809,626              | 3,809,626               | 9,332,246                             | 9,332,246             | 9,332,246               |
| R-squared                              | 0.11                   | 0.11                   | 0.11                    | 0.01                                  | 0.01                  | 0.01                    |
| baseline mean                          | 79.36                  | 79.36                  | 79.36                   | 16.64                                 | 16.64                 | 16.64                   |
| <b>Panel B: Log changes</b>            |                        |                        |                         |                                       |                       |                         |
| post shelter in place                  | -0.250***<br>(0.0222)  | -0.155***<br>(0.0235)  | -0.0688***<br>(0.0178)  | -0.200***<br>(0.00547)                | -0.129***<br>(0.0108) | -0.0573***<br>(0.00645) |
| Weeks since first case FE              |                        | X                      | X                       |                                       | X                     | X                       |
| Weeks since first death FE             |                        | X                      | X                       |                                       | X                     | X                       |
| Year X Week FE                         |                        |                        | X                       |                                       |                       | X                       |
| Observations                           | 3,809,626              | 3,809,626              | 3,809,626               | 9,332,246                             | 9,332,246             | 9,332,246               |
| R-squared                              | 0.15                   | 0.15                   | 0.15                    | 0.07                                  | 0.07                  | 0.07                    |
| Baseline mean                          | 3.85                   | 3.85                   | 3.85                    | 2.27                                  | 2.27                  | 2.27                    |

Caption: The shelter in place dummy is turned on when the policy is enacted. The shelter in place dummy is turned off when the policy is ended. Unit of analysis is the number of visits in a week to health care provider locations. Baseline means are calculated based on the ninth week of 2019. Regression models were estimated using ordinary least squares. The outcome measure is the number of visits and regressions include fixed effects for county and week. We use the four-digit NAICS code to identify office of physicians (6211), general medical and surgical hospitals (6221), health and personal care stores (4461), and offices of dentists (6212). Standard errors are clustered at the county level. \*\*\* p<0.01, \*\* p<0.05, \* p<0.1

**Appendix Table 8:** Effect of State-Elective Procedure Ban Policies on Preventive, Elective, and Non-Elective Procedure Utilization

|                                   | (1)                  | (2)                       | (3)                  | (4)                   | (5)                            | (6)                   | (7)                    | (8)                     | (9)                  |
|-----------------------------------|----------------------|---------------------------|----------------------|-----------------------|--------------------------------|-----------------------|------------------------|-------------------------|----------------------|
| <b>Panel A: Preventive Care</b>   |                      | <b>Colonoscopy</b>        |                      |                       | <b>Mammogram</b>               |                       |                        | <b>Immunizations</b>    |                      |
| post shelter in place             | -1.909***<br>(0.428) | -1.279***<br>(0.274)      | -0.663***<br>(0.212) | -7.986***<br>(1.613)  | -4.181***<br>(1.061)           | -2.498***<br>(0.964)  | -3.891***<br>(0.849)   | -0.208<br>(1.400)       | -1.608***<br>(0.560) |
| Weeks since first case FE         |                      | X                         | X                    |                       | X                              | X                     |                        | X                       | X                    |
| Weeks since first death FE        |                      | X                         | X                    |                       | X                              | X                     |                        | X                       | X                    |
| Year X Week FE                    |                      |                           | X                    |                       |                                | X                     |                        |                         | X                    |
| Observations                      | 1,064,825            | 1,064,825                 | 1,064,825            | 529,256               | 529,256                        | 529,256               | 418,103                | 418,103                 | 418,103              |
| R-squared                         | 0.703                | 0.714                     | 0.749                | 0.781                 | 0.792                          | 0.816                 | 0.88                   | 0.894                   | 0.904                |
| baseline mean                     | 4.1                  | 4.1                       | 4.1                  | 21.6                  | 21.6                           | 21.6                  | 22.0                   | 22.0                    | 22.0                 |
| <b>Panel B: Elective Care</b>     |                      | <b>MRI</b>                |                      |                       | <b>Musculoskeletal surgery</b> |                       |                        | <b>Cataract surgery</b> |                      |
| post shelter in place             | -1.096***<br>(0.237) | -0.687***<br>(0.140)      | -0.204**<br>(0.0866) | -0.282***<br>(0.0664) | -0.155***<br>(0.0403)          | -0.106**<br>(0.0434)  | -0.0629***<br>(0.0185) | -0.0560**<br>(0.0223)   | -0.0174<br>(0.0123)  |
| Weeks since first case FE         |                      | X                         | X                    |                       | X                              | X                     |                        | X                       | X                    |
| Weeks since first death FE        |                      | X                         | X                    |                       | X                              | X                     |                        | X                       | X                    |
| Year X Week FE                    |                      |                           | X                    |                       |                                | X                     |                        |                         | X                    |
| Observations                      | 3,567,685            | 3,567,685                 | 3,567,685            | 3,567,685             | 3,567,685                      | 3,567,685             | 3,567,685              | 3,567,685               | 3,567,685            |
| R-squared                         | 0.616                | 0.619                     | 0.628                | 0.488                 | 0.491                          | 0.499                 | 0.255                  | 0.258                   | 0.263                |
| baseline mean                     | 3.3                  | 3.3                       | 3.3                  | 1.1                   | 1.1                            | 1.1                   | 0.2                    | 0.2                     | 0.2                  |
| <b>Panel C: Non-Elective Care</b> |                      | <b>Labor and delivery</b> |                      |                       | <b>Chemotherapy</b>            |                       |                        | <b>Angiograms</b>       |                      |
| post shelter in place             | -0.111<br>(0.0783)   | -0.0493<br>(0.0942)       | 0.0675<br>(0.0797)   | -0.128***<br>(0.0402) | -0.164***<br>(0.0393)          | -0.0809**<br>(0.0348) | -0.134***<br>(0.0287)  | -0.0615*<br>(0.0352)    | -0.0188<br>(0.0199)  |
| Weeks since first case FE         |                      | X                         | X                    |                       | X                              | X                     |                        | X                       | X                    |
| Weeks since first death FE        |                      | X                         | X                    |                       | X                              | X                     |                        | X                       | X                    |
| Year X Week FE                    |                      |                           | X                    |                       |                                | X                     |                        |                         | X                    |
| Observations                      | 1,064,971            | 1,064,971                 | 1,064,971            | 3,567,685             | 3,567,685                      | 3,567,685             | 3,567,685              | 3,567,685               | 3,567,685            |
| R-squared                         | 0.555                | 0.556                     | 0.556                | 0.542                 | 0.543                          | 0.544                 | 0.439                  | 0.441                   | 0.442                |
| baseline mean                     | 1.8                  | 1.8                       | 1.8                  | 1.5                   | 1.5                            | 1.5                   | 0.5                    | 0.5                     | 0.5                  |

Baseline means are calculated based on the ninth week of 2019. Regression models were estimated using ordinary least squares. Regression models also include controls for the patient's age and gender, and fixed effects for week and county. The outcome measure is the number of patients, and all models are weighted for the total number of eligible enrollees. Standard errors are clustered at the county level. Immunizations are restricted to those aged 2 or younger. Colonoscopy is restricted to those 46 to 64. Mammograms were restricted to females aged 46 to 64. Deliveries were restricted to women between the ages of 19 and 45. \*\*\* p<0.01, \*\* p<0.05, \* p<0.1



**Appendix Table 9:** Effect of State-Elective Procedure Ban Policies on Log-Transformed Preventive, Elective, and Non-Elective Procedure Utilization

|                                   | (1)                     | (4)                   | (5)                    | (6)                     | (9)                     | (10)                   | (11)                    | (14)                    | (15)                   |
|-----------------------------------|-------------------------|-----------------------|------------------------|-------------------------|-------------------------|------------------------|-------------------------|-------------------------|------------------------|
| <b>Panel A: Preventive Care</b>   |                         |                       |                        |                         |                         |                        |                         |                         |                        |
|                                   |                         | Colonoscopy           |                        |                         | Mammogram               |                        |                         | Immunizations           |                        |
| post shelter in place             | -0.341***<br>(0.0341)   | -0.248***<br>(0.0418) | -0.0910***<br>(0.0285) | -0.384***<br>(0.0224)   | -0.410***<br>(0.0527)   | -0.0828***<br>(0.0276) | -0.122***<br>(0.0134)   | -0.0832***<br>(0.0200)  | -0.0583***<br>(0.0199) |
| Weeks since first case FE         |                         | X                     | X                      |                         | X                       | X                      |                         | X                       | X                      |
| Weeks since first death FE        |                         | X                     | X                      |                         | X                       | X                      |                         | X                       | X                      |
| Year X Week FE                    |                         |                       | X                      |                         |                         | X                      |                         |                         | X                      |
| Observations                      | 1,064,825               | 1,064,825             | 1,064,825              | 529,256                 | 529,256                 | 529,256                | 418,103                 | 418,103                 | 418,103                |
| R-squared                         | 0.737                   | 0.753                 | 0.779                  | 0.867                   | 0.888                   | 0.902                  | 0.927                   | 0.928                   | 0.929                  |
| baseline mean                     | 4.1                     | 4.1                   | 4.1                    | 21.6                    | 21.6                    | 21.6                   | 22.0                    | 22.0                    | 22.0                   |
| <b>Panel B: Elective Care</b>     |                         |                       |                        |                         |                         |                        |                         |                         |                        |
|                                   |                         | MRI                   |                        |                         | Musculoskeletal surgery |                        |                         | Cataract surgery        |                        |
| post shelter in place             | -0.161***<br>(0.0159)   | -0.119***<br>(0.0204) | -0.0209<br>(0.0132)    | -0.0849***<br>(0.0120)  | -0.0624***<br>(0.0121)  | -0.0307***<br>(0.0107) | -0.0261***<br>(0.00570) | -0.0211***<br>(0.00695) | -0.00406<br>(0.00588)  |
| Weeks since first case FE         |                         | X                     | X                      |                         | X                       | X                      |                         | X                       | X                      |
| Weeks since first death FE        |                         | X                     | X                      |                         | X                       | X                      |                         | X                       | X                      |
| Year X Week FE                    |                         |                       | X                      |                         |                         | X                      |                         |                         | X                      |
| Observations                      | 3,567,685               | 3,567,685             | 3,567,685              | 3,567,685               | 3,567,685               | 3,567,685              | 3,567,685               | 3,567,685               | 3,567,685              |
| R-squared                         | 0.716                   | 0.718                 | 0.721                  | 0.55                    | 0.553                   | 0.558                  | 0.295                   | 0.298                   | 0.303                  |
| baseline mean                     | 3.3                     | 3.3                   | 3.3                    | 1.1                     | 1.1                     | 1.1                    | 0.2                     | 0.2                     | 0.2                    |
| <b>Panel C: Non-Elective Care</b> |                         |                       |                        |                         |                         |                        |                         |                         |                        |
|                                   |                         | Labor and delivery    |                        |                         | Chemotherapy            |                        |                         | Angiograms              |                        |
| post shelter in place             | -0.0261***<br>(0.00822) | -0.0131<br>(0.0120)   | -0.00882<br>(0.00895)  | -0.0369***<br>(0.00599) | -0.0303***<br>(0.00831) | -0.0142<br>(0.00902)   | -0.0531***<br>(0.00843) | -0.0350***<br>(0.0102)  | -0.0109<br>(0.00682)   |
| Weeks since first case FE         |                         | X                     | X                      |                         | X                       | X                      |                         | X                       | X                      |
| Weeks since first death FE        |                         | X                     | X                      |                         | X                       | X                      |                         | X                       | X                      |
| Year X Week FE                    |                         |                       | X                      |                         |                         | X                      |                         |                         | X                      |
| Observations                      | 1,064,971               | 1,064,971             | 1,064,971              | 3,567,685               | 3,567,685               | 3,567,685              | 3,567,685               | 3,567,685               | 3,567,685              |
| R-squared                         | 0.646                   | 0.646                 | 0.646                  | 0.626                   | 0.626                   | 0.626                  | 0.477                   | 0.479                   | 0.479                  |
| baseline mean                     | 1.8                     | 1.8                   | 1.8                    | 1.5                     | 1.5                     | 1.5                    | 0.5                     | 0.5                     | 0.5                    |

Baseline means are calculated based on the ninth week of 2019. The shelter in place dummy is turned on when the policy is enacted. The shelter in place dummy is turned off when the policy is ended. Regression models were estimated using ordinary least squares. Regression models also include controls for the patient's age and gender, and fixed effects for week and county. The outcome measure is the log-transformed number of patients, and all models are weighted for the total number of eligible enrollees. Standard errors are clustered at the county level. Immunizations are restricted to those aged 2 or younger. Colonoscopy is restricted to those 46 to 64. Mammograms were restricted to females aged 46 to 64. Deliveries were restricted to women between the ages of 19 and 45. \*\*\* p<0.01, \*\* p<0.05, \* p<0.1

**Appendix Table 10:** Effect of State-Elective Procedure Ban Policies on Visits to Physician Office, General and Medical Service Hospitals, Health and Personal Care Stores, and Office of Dentists

|                                        | (1)                   | (2)                    | (3)                   | (4)                                   | (5)                    | (6)                   |
|----------------------------------------|-----------------------|------------------------|-----------------------|---------------------------------------|------------------------|-----------------------|
|                                        | Offices of Physicians |                        |                       | General and Medical Service Hospitals |                        |                       |
| <b>Panel A: Level changes</b>          |                       |                        |                       |                                       |                        |                       |
| post shelter in place                  | -6.825***<br>(0.442)  | -1.885***<br>(0.533)   | 0.0474<br>(0.506)     | -101.9***<br>(16.78)                  | -80.35***<br>(25.67)   | -64.88**<br>(29.13)   |
| Weeks since first case FE              |                       | X                      | X                     |                                       | X                      | X                     |
| Weeks since first death FE             |                       | X                      | X                     |                                       | X                      | X                     |
| Year X Week FE                         |                       |                        | X                     |                                       |                        | X                     |
| Observations                           | 13,430,991            | 13,430,991             | 13,430,991            | 1,045,379                             | 1,045,379              | 1,045,379             |
| R-squared                              | 0.03                  | 0.03                   | 0.03                  | 0.17                                  | 0.17                   | 0.17                  |
| baseline mean                          | 31.09                 | 31.09                  | 31.09                 | 363.11                                | 363.11                 | 363.11                |
| <b>Panel B: Log changes</b>            |                       |                        |                       |                                       |                        |                       |
| post shelter in place                  | -0.186***<br>(0.0107) | -0.0752***<br>(0.0136) | -0.0158*<br>(0.00851) | -0.270***<br>(0.0519)                 | -0.315***<br>(0.0761)  | -0.264***<br>(0.0858) |
| Weeks since first case FE              |                       | X                      | X                     |                                       | X                      | X                     |
| Weeks since first death FE             |                       | X                      | X                     |                                       | X                      | X                     |
| Year X Week FE                         |                       |                        | X                     |                                       |                        | X                     |
| Observations                           | 13,430,991            | 13,430,991             | 13,430,991            | 1,045,379                             | 1,045,379              | 1,045,379             |
| R-squared                              | 0.06                  | 0.06                   | 0.06                  | 0.23                                  | 0.23                   | 0.23                  |
| Baseline mean                          | 2.60                  | 2.60                   | 2.60                  | 4.44                                  | 4.44                   | 4.44                  |
| <b>Health and Personal Care Stores</b> |                       |                        |                       |                                       |                        |                       |
| <b>Office of Dentists</b>              |                       |                        |                       |                                       |                        |                       |
| <b>Panel A: Level changes</b>          |                       |                        |                       |                                       |                        |                       |
| post shelter in place                  | -16.48***<br>(1.655)  | -6.385***<br>(1.905)   | -1.954<br>(1.322)     | -3.263***<br>(0.352)                  | -1.365**<br>(0.533)    | -0.138<br>(0.559)     |
| Weeks since first case FE              |                       | X                      | X                     |                                       | X                      | X                     |
| Weeks since first death FE             |                       | X                      | X                     |                                       | X                      | X                     |
| Year X Week FE                         |                       |                        | X                     |                                       |                        | X                     |
| Observations                           | 3,809,626             | 3,809,626              | 3,809,626             | 9,332,246                             | 9,332,246              | 9,332,246             |
| R-squared                              | 0.11                  | 0.11                   | 0.11                  | 0.01                                  | 0.01                   | 0.01                  |
| baseline mean                          | 79.36                 | 79.36                  | 79.36                 | 16.64                                 | 16.64                  | 16.64                 |
| <b>Panel B: Log changes</b>            |                       |                        |                       |                                       |                        |                       |
| post shelter in place                  | -0.236***<br>(0.0242) | -0.105***<br>(0.0262)  | -0.0399**<br>(0.0158) | -0.157***<br>(0.00995)                | -0.0832***<br>(0.0152) | -0.0107<br>(0.00856)  |
| Weeks since first case FE              |                       | X                      | X                     |                                       | X                      | X                     |
| Weeks since first death FE             |                       | X                      | X                     |                                       | X                      | X                     |
| Year X Week FE                         |                       |                        | X                     |                                       |                        | X                     |
| Observations                           | 3,809,626             | 3,809,626              | 3,809,626             | 9,332,246                             | 9,332,246              | 9,332,246             |
| R-squared                              | 0.15                  | 0.15                   | 0.15                  | 0.07                                  | 0.07                   | 0.07                  |
| Baseline mean                          | 3.85                  | 3.85                   | 3.85                  | 2.27                                  | 2.27                   | 2.27                  |

Caption: Unit of analysis is the number of visits in a week to health care provider locations. Baseline means are calculated based on the ninth week of 2019. Regression models were estimated using ordinary least squares. The outcome measure is the number of visits and regressions include fixed effects for county and week. We use the four-digit NAICS code to identify office of physicians (6211), general medical and surgical hospitals (6221), health and personal care stores (4461), and offices of dentists (6212). Standard errors are clustered at the county level. \*\*\* p<0.01, \*\* p<0.05, \* p<0.1

**Appendix Table 11:** Effect of State-Elective Procedure Ban Policies on Visits to Medical and Diagnostic Laboratories, Nursing Care Facilities, Retirement Communities and Specialty Hospitals

|                               | (1)                                                   | (2)                    | (3)                   | (4)                     | (5)                   | (6)                    |
|-------------------------------|-------------------------------------------------------|------------------------|-----------------------|-------------------------|-----------------------|------------------------|
|                               | Medical and Diagnostic Laboratories                   |                        |                       | Nursing Care Facilities |                       |                        |
| <b>Panel A: Level changes</b> |                                                       |                        |                       |                         |                       |                        |
| post shelter in place         | -4.751***<br>(0.633)                                  | -1.524*<br>(0.777)     | 0.765<br>(0.671)      | -11.54***<br>(1.215)    | -5.464***<br>(1.326)  | -1.619<br>(1.312)      |
| Weeks since first case FE     |                                                       | X                      | X                     |                         | X                     | X                      |
| Weeks since first death FE    |                                                       | X                      | X                     |                         | X                     | X                      |
| Year X Week FE                |                                                       |                        | X                     |                         |                       | X                      |
| Observations                  | 1,157,337                                             | 1,157,337              | 1,157,337             | 748,765                 | 748,765               | 748,765                |
| R-squared                     | 0.07                                                  | 0.07                   | 0.07                  | 0.21                    | 0.21                  | 0.22                   |
| baseline mean                 | 28.09                                                 | 28.09                  | 28.09                 | 61.54                   | 61.54                 | 61.54                  |
| <b>Panel B: Log changes</b>   |                                                       |                        |                       |                         |                       |                        |
| post shelter in place         | -0.182***<br>(0.0137)                                 | -0.0894***<br>(0.0168) | -0.0209*<br>(0.0127)  | -0.246***<br>(0.0194)   | -0.145***<br>(0.0209) | -0.0764***<br>(0.0184) |
| Weeks since first case FE     |                                                       | X                      | X                     |                         | X                     | X                      |
| Weeks since first death FE    |                                                       | X                      | X                     |                         | X                     | X                      |
| Year X Week FE                |                                                       |                        | X                     |                         |                       | X                      |
| Observations                  | 1,157,337                                             | 1,157,337              | 1,157,337             | 748,765                 | 748,765               | 748,765                |
| R-squared                     | 0.10                                                  | 0.10                   | 0.10                  | 0.23                    | 0.24                  | 0.24                   |
| Baseline mean                 | 2.59                                                  | 2.59                   | 2.59                  | 3.68                    | 3.68                  | 3.68                   |
|                               | Retirement Communities and Assisted Living Facilities |                        |                       | Specialty Hospitals     |                       |                        |
| <b>Panel A: Level changes</b> |                                                       |                        |                       |                         |                       |                        |
| post shelter in place         | -6.752***<br>(0.590)                                  | -2.225***<br>(0.691)   | 0.583<br>(0.554)      | -8.864***<br>(1.885)    | -4.041*<br>(2.241)    | -0.931<br>(2.675)      |
| Weeks since first case FE     |                                                       | X                      | X                     |                         | X                     | X                      |
| Weeks since first death FE    |                                                       | X                      | X                     |                         | X                     | X                      |
| Year X Week FE                |                                                       |                        | X                     |                         |                       | X                      |
| Observations                  | 1,622,258                                             | 1,622,258              | 1,622,258             | 294,129                 | 294,129               | 294,129                |
| R-squared                     | 0.13                                                  | 0.13                   | 0.13                  | 0.16                    | 0.16                  | 0.16                   |
| baseline mean                 | 39.80                                                 | 39.80                  | 39.80                 | 39.71                   | 39.71                 | 39.71                  |
| <b>Panel B: Log changes</b>   |                                                       |                        |                       |                         |                       |                        |
| post shelter in place         | -0.208***<br>(0.0125)                                 | -0.0947***<br>(0.0147) | -0.0204**<br>(0.0102) | -0.253***<br>(0.0221)   | -0.159***<br>(0.0263) | -0.0895***<br>(0.0275) |
| Weeks since first case FE     |                                                       | X                      | X                     |                         | X                     | X                      |
| Weeks since first death FE    |                                                       | X                      | X                     |                         | X                     | X                      |
| Year X Week FE                |                                                       |                        | X                     |                         |                       | X                      |
| Observations                  | 1,622,258                                             | 1,622,258              | 1,622,258             | 294,129                 | 294,129               | 294,129                |
| R-squared                     | 0.17                                                  | 0.18                   | 0.18                  | 0.21                    | 0.21                  | 0.22                   |
| Baseline mean                 | 3.19                                                  | 3.19                   | 3.19                  | 2.77                    | 2.77                  | 2.77                   |

Caption: Unit of analysis is the number of visits in a week to health care provider locations. Baseline means are calculated based on the ninth week of 2019. Regression models were estimated using ordinary least squares and regressions include fixed effects for county and week. The outcome measure is the number of visits. We use the four-digit NAICS code to identify medical and diagnostic laboratories (6215), nursing care facilities (6231), retirement communities and assisted living facilities (6233), and specialty hospitals (6223). Standard errors are clustered at the county level. \*\*\* p<0.01, \*\* p<0.05, \* p<0.1

# Supplemental Appendix Figures

Figure A.1: Alternative Policy: Week of First COVID-19 Death in County

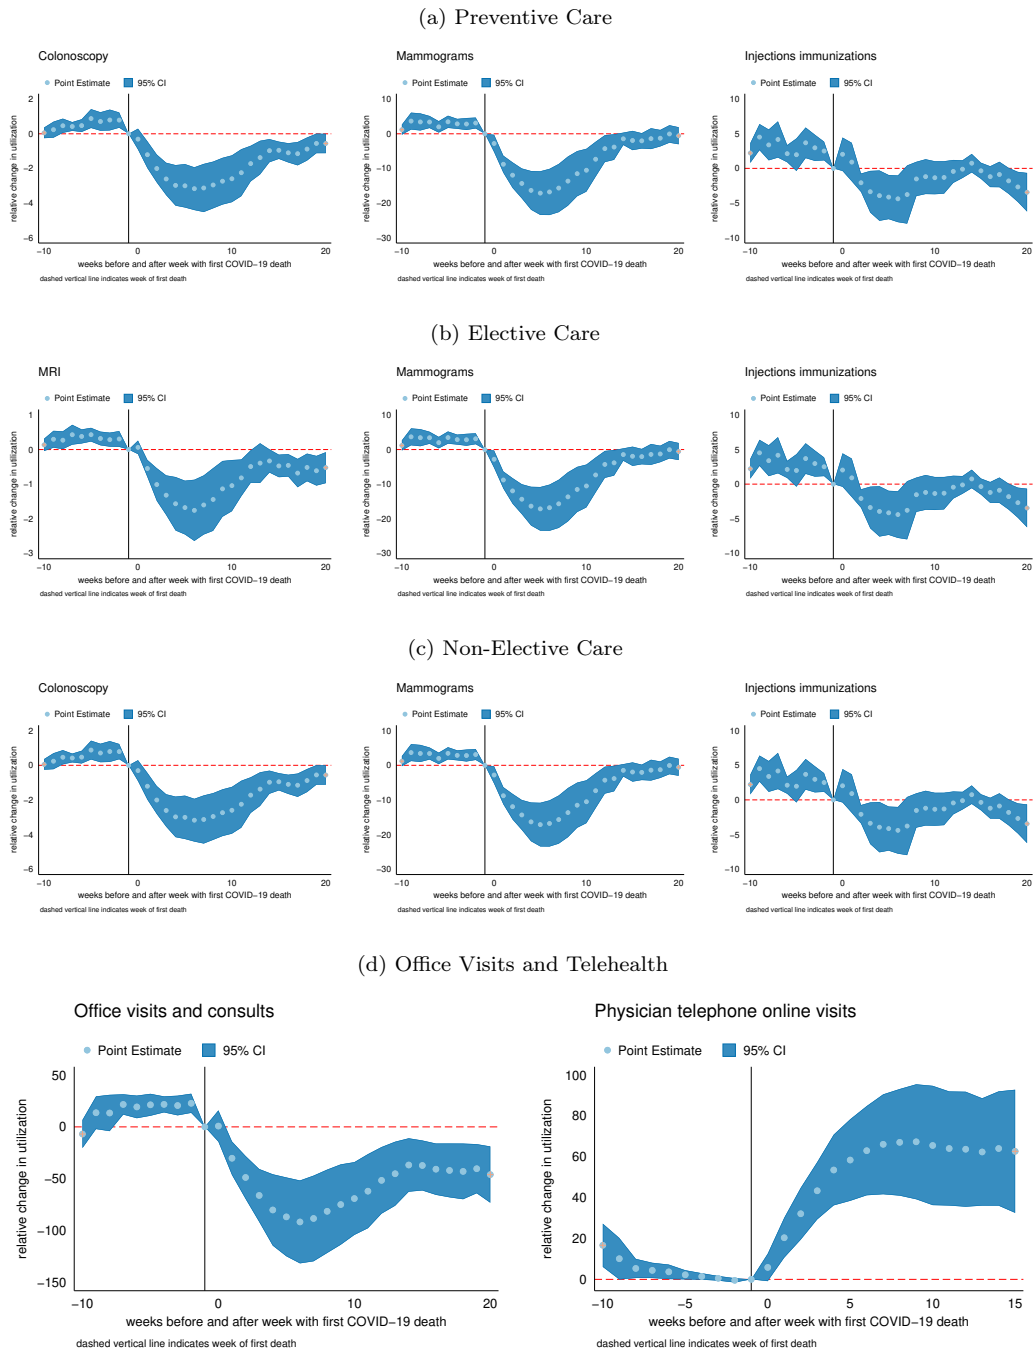

These figures present event study results that estimate the change in utilization for each service in the weeks before and after the first COVID-19 death in a county. The event study regressions are specified in equation (2).

Figure A.2: Alternative Policy: First Week with 10 COVID-19 Deaths in County

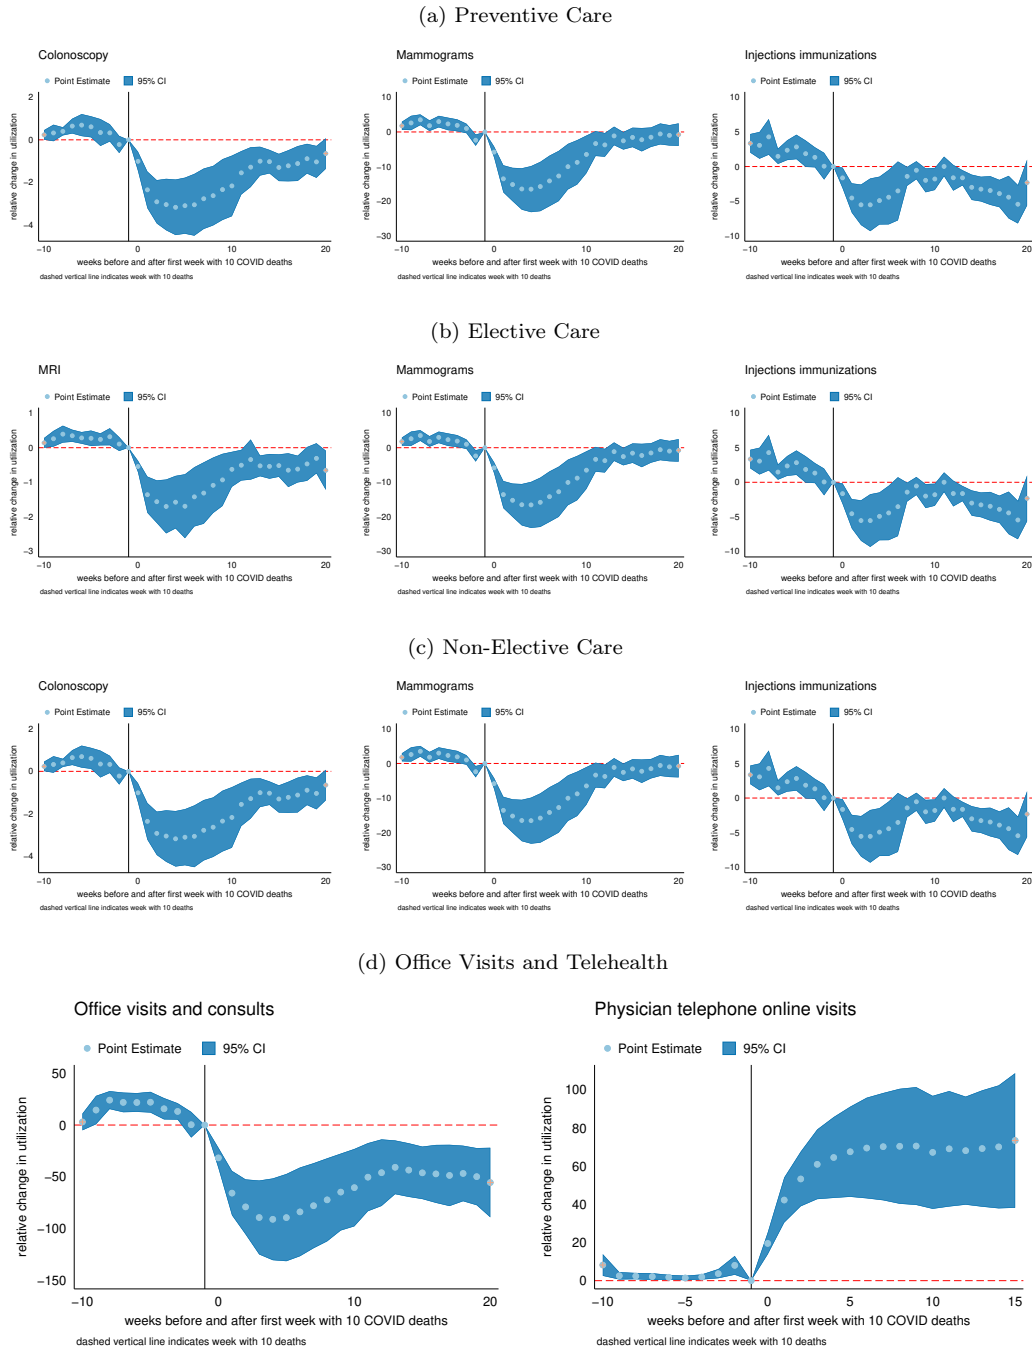

These figures present event study results that estimate the change in utilization for each service in the weeks before and after the first week with 10 or more COVID-19 deaths in a county. The event study regressions are specified in equation (2).

Figure A.3: Fixed Effects for Weeks Since First COVID-19 Case

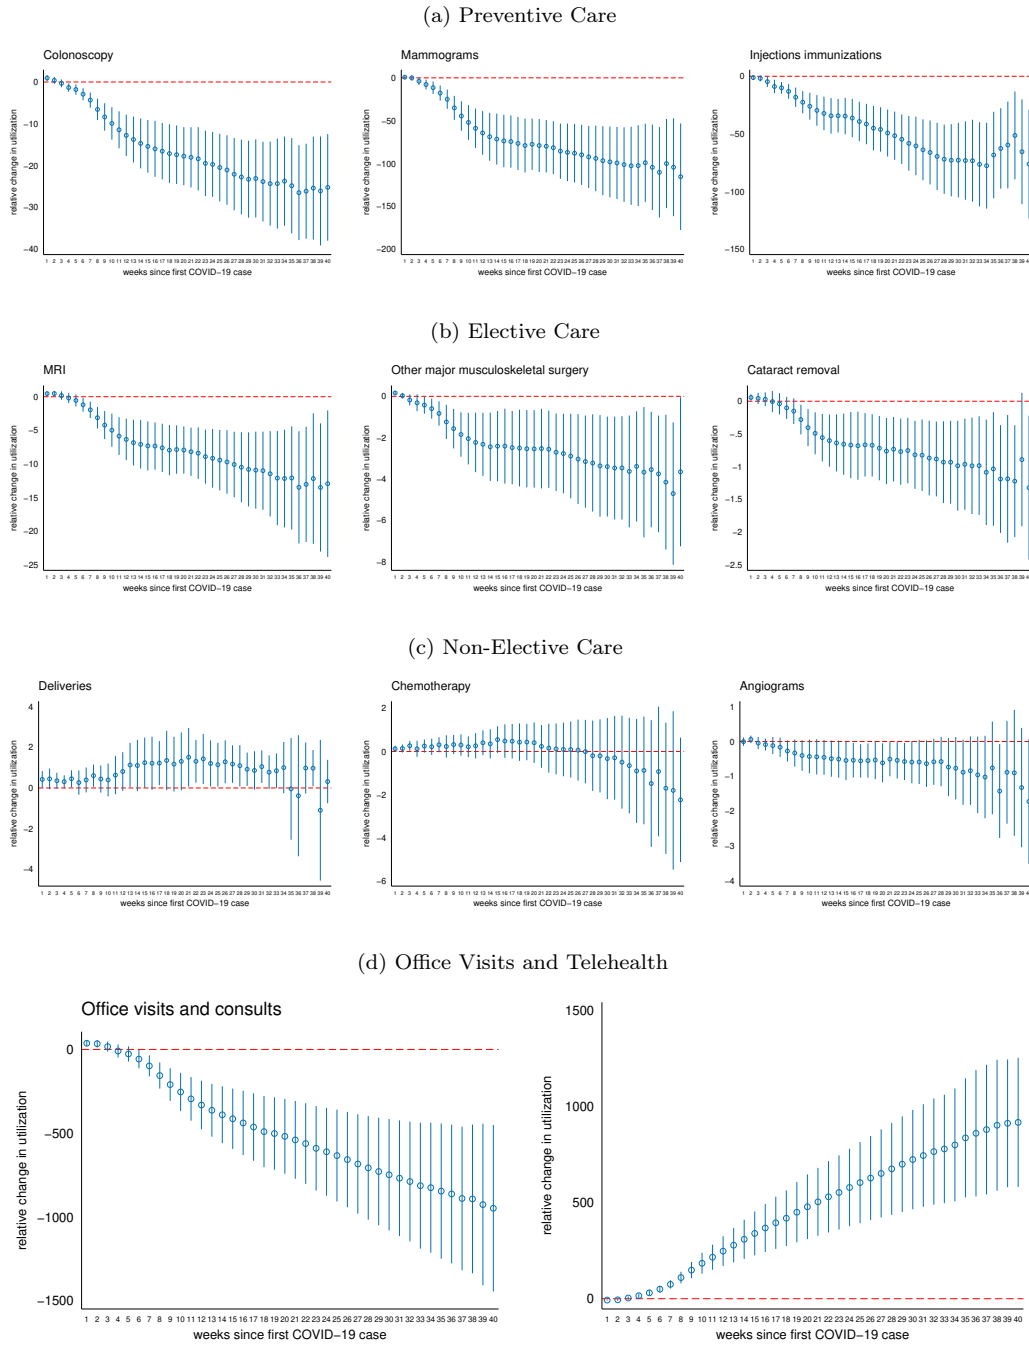

These figures present the  $\sum_t \phi_t caseweeks_{gt}$  fixed effects from equation (1) that measure the number of weeks since the first COVID-19 case in a county.

Figure A.4: Fixed Effects for Weeks Since First COVID-19 Death

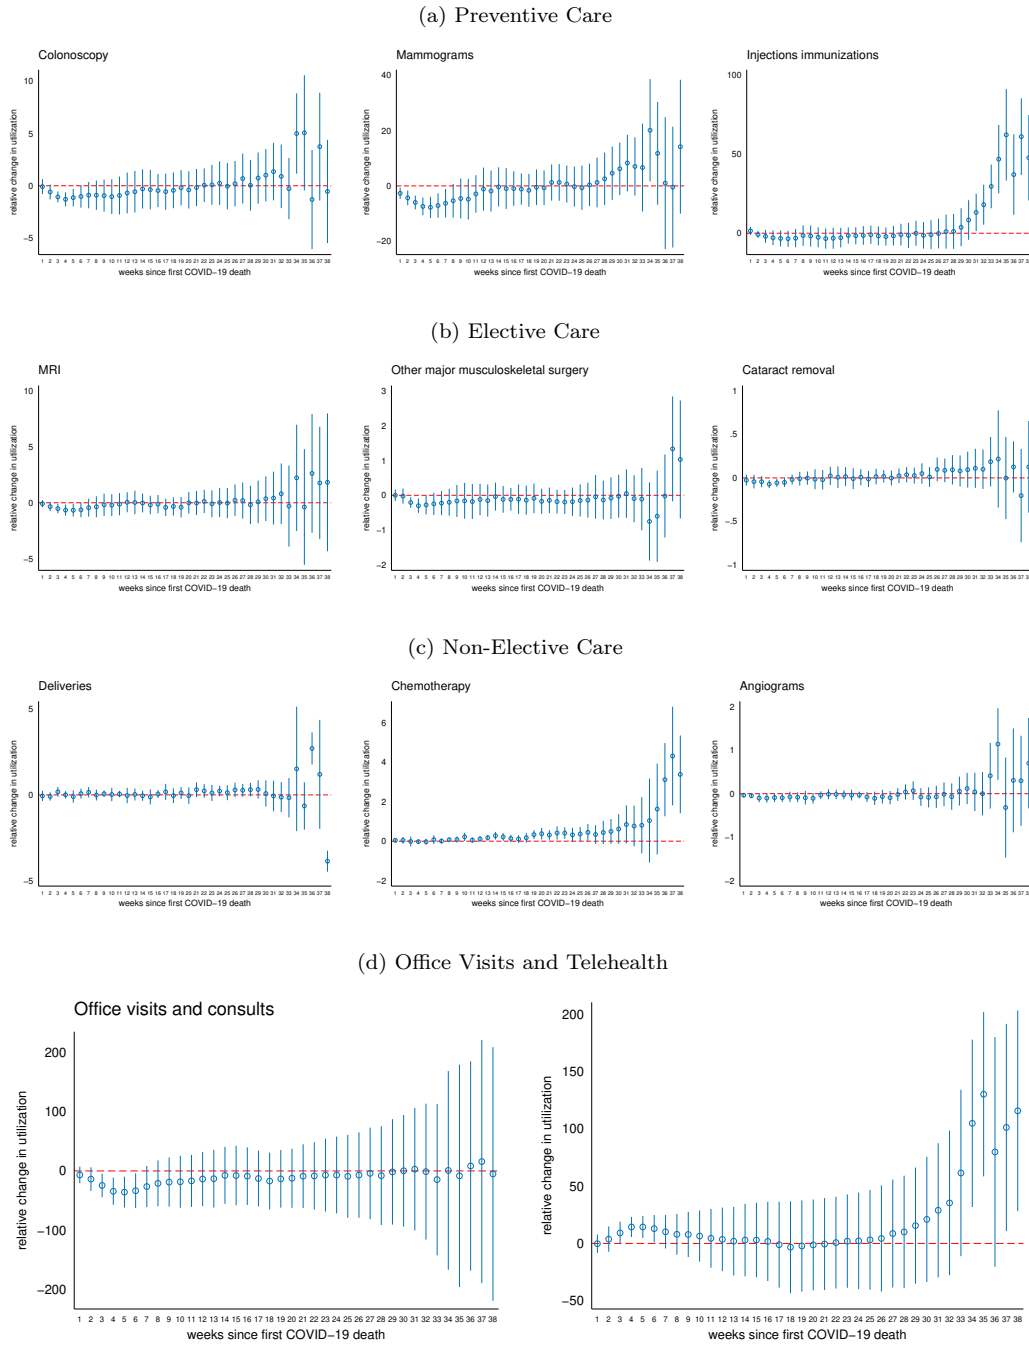

These figures present the  $\sum_t \phi_t deathweeks_{gt}$  fixed effects from equation (1) that measure the number of weeks since the first COVID-19 death in a county.

Figure A.5: Trends in Weekly Visits to Physician Office and Hospital Locations Using Cellular Phone Mobility Data for 2020

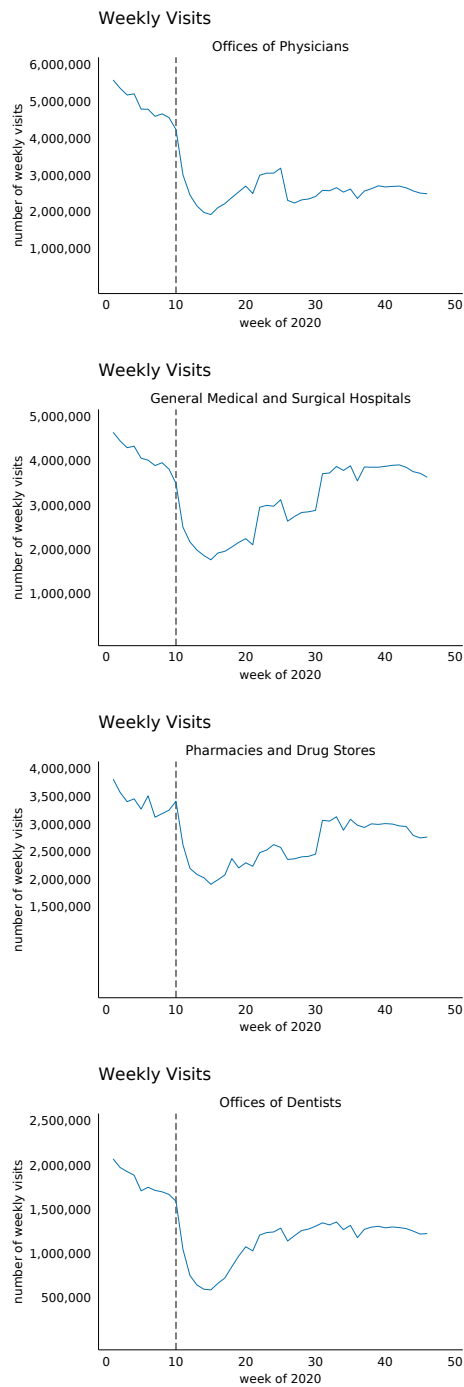

Total number of weekly visits were calculated for hospitals and offices of physicians in the SafeGraph data. We use the four-digit NAICS code to identify office of physicians (6211), general medical and surgical hospitals (6221), health and personal care stores (4461), and offices of dentists (6212).



Figure A.6: Trends in Weekly Visits to Medical and Diagnostic Laboratories, Nursing Care Facilities, Retirement Communities and Specialty Hospitals Using Cellular Phone Mobility Data for 2020

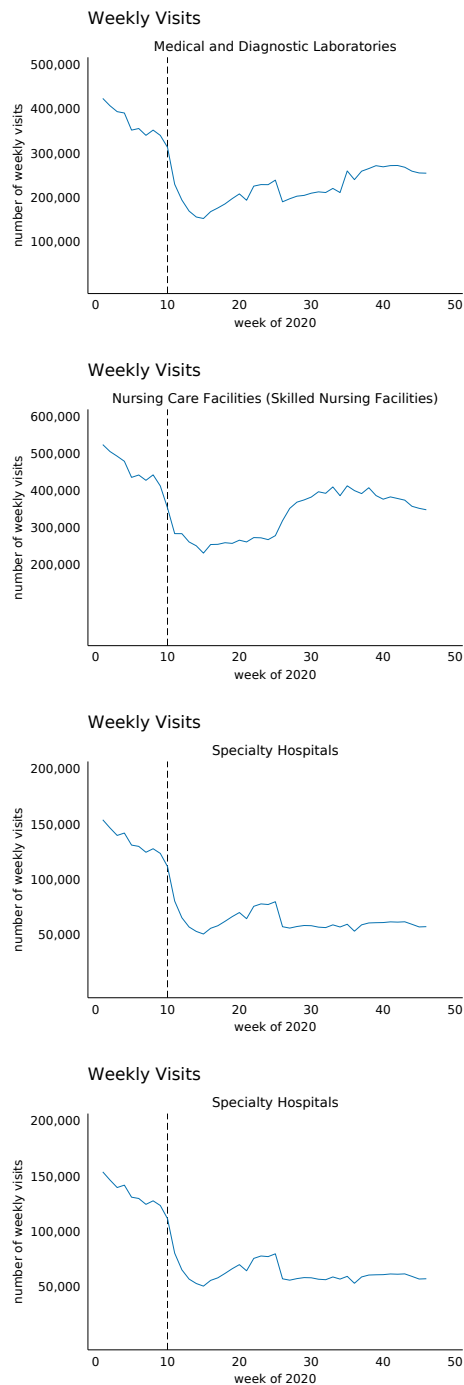

Total number of weekly visits were calculated for hospitals and offices of physicians in the SafeGraph data. We use the four-digit NAICS code to identify medical and diagnostic laboratories (6215), nursing care facilities (6231), retirement communities and assisted living facilities (6233), and specialty hospitals (6223).
